# Supplementary material for: Effect of S-1 Plus Oxaliplatin Compared With Fluorouracil, Leucovorin Plus Oxaliplatin as Perioperative Chemotherapy for Locally Advanced, Resectable Gastric Cancer: A Randomized Clinical Trial
Source: PubMed Central journal article supplement (PMC8886520; doi:10.1001/jamanetworkopen.2022.0426), 2022-02-28
Supplement: jamanetwopen-e220426-s002.pdf [file jamanetwopen-e220426-s002.pdf]

## Supplemental Online Content

Yu J, Gao Y, Chen L, et al. Effect of S-1 plus oxaliplatin compared with fluorouracil, leucovorin plus oxaliplatin as perioperative chemotherapy for locally advanced, resectable gastric cancer: a randomized clinical trial. *JAMA Netw Open*. 2022;5(2):e220426. doi:10.1001/jamanetworkopen.2022.0426

**eTable.** Hematological and Nonhematological Toxicities Associated With Perioperative Chemotherapy

This supplemental material has been provided by the authors to give readers additional information about their work.

**eTable. Hematological and Nonhematological Toxicities Associated With Perioperative Chemotherapy**

|                        | SOX (N=288)        |                   | RR (95% CI)       | FOLFOX (N=283)     |                   | RR (95% CI)       |
|------------------------|--------------------|-------------------|-------------------|--------------------|-------------------|-------------------|
|                        | All grades no. (%) | Grade 3/4 no. (%) |                   | All grades no. (%) | Grade 3/4 no. (%) |                   |
| <b>Hematologic</b>     |                    |                   |                   |                    |                   |                   |
| Leukocytopenia         | 218(75.7)          | 17(5.9)           | 1.12 (0.77, 1.61) | 192(67.8)          | 12(4.2)           | 1.39 (0.65, 2.97) |
| Neutrocytopenia        | 224(77.8)          | 56(19.4)          | 1.04 (0.71, 1.53) | 212(74.9)          | 69(24.3)          | 0.80 (0.54, 1.19) |
| Thrombocytopenia       | 173(60.1)          | 32(11.1)          | 1.87 (1.33, 2.63) | 91(32.2)           | 8(2.8)            | 3.93 (1.78, 8.69) |
| Anemia                 | 192(66.7)          | 33(11.5)          | 1.26 (0.90, 1.76) | 150(53.0)          | 26(9.2)           | 1.25 (0.73, 2.15) |
| <b>Non-hematologic</b> |                    |                   |                   |                    |                   |                   |
| ALT                    | 140(48.6)          | 2(0.7)            | 0.99 (0.71, 1.37) | 139(49.1)          | 6(2.1)            | 0.33 (0.07, 1.64) |
| AST                    | 136(47.4)          | 1(0.3)            | 1.26 (0.90, 1.76) | 106(37.5)          | 3(1.1)            | 0.33 (0.03, 3.17) |
| Cr                     | 35(12.2)           | 0                 | 1.07 (0.65, 1.79) | 32(11.3)           | 0                 | NA                |
| Fatigue                | 100(34.7)          | 3(1.0)            | 0.81 (0.58, 1.14) | 121(42.8)          | 4(1.4)            | 0.74 (0.16, 3.32) |
| Alopecia               | 33(11.5)           | NA                | 0.60 (0.38, 0.96) | 54(19.1)           | NA                | NA                |
| Hyperpigmentation      | 75(26.0)           | NA                | 1.45 (0.97, 2.16) | 51(18.0)           | NA                | NA                |
| Fever                  | 35(12.2)           | 1(0.3)            | 1.23 (0.73, 2.08) | 28(9.9)            | 3(1.1)            | 0.33 (0.03, 3.17) |

|                    |           |         |                   |  |           |         |                    |
|--------------------|-----------|---------|-------------------|--|-----------|---------|--------------------|
| Hand-foot syndrome | 40(13.9)  | 0       | 1.51 (0.90, 2.55) |  | 26(9.2)   | 3(1.1)  | NA                 |
| Anorexia           | 78(27.1)  | 1(0.3)  | 0.67 (0.47, 0.95) |  | 115(40.6) | 2(0.7)  | 0.49 (0.04, 5.45)  |
| Constipation       | 34(11.8)  | 1(0.3)  | 0.98 (0.59, 1.63) |  | 34(12.0)  | 0       | NA                 |
| Diarrhea           | 75(26.0)  | 5(1.7)  | 1.10 (0.75, 1.61) |  | 67(23.7)  | 4(1.4)  | 1.23 (0.33, 4.62)  |
| Mucositis          | 40(13.9)  | 1(0.3)  | 0.98 (0.61, 1.58) |  | 40(14.1)  | 2(0.7)  | 0.49 (0.04, 5.45)  |
| Nausea             | 158(54.9) | 23(8.0) | 0.85 (0.61, 1.19) |  | 183(64.7) | 18(6.4) | 1.26 (0.66, 2.38)  |
| Vomiting           | 129(44.8) | 20(6.9) | 0.99 (0.71, 1.38) |  | 128(45.2) | 28(9.9) | 0.70 (0.39, 1.28)  |
| Sensory neuropathy | 127(44.1) | 2(0.7)  | 0.91 (0.66, 1.27) |  | 137(48.4) | 1(0.4)  | 1.97 (0.18, 21.80) |

SOX=S-1 and oxaliplatin; FOLFOX=fluorouracil leucovorin and oxaliplatin; RR=relative risk; CI= confidence interval; ALT=alanine aminotransferase; AST=aspartate aminotransferase; Cr=Creatinine; NA=not applicable. Grade3/4 is not applicable for alopecia and hyperpigmentation according to Common Terminology Criteria for Adverse Events (CTCAE) 3.0.
