# Supplementary material for: Effect of S-1 Plus Oxaliplatin Compared With Fluorouracil, Leucovorin Plus Oxaliplatin as Perioperative Chemotherapy for Locally Advanced, Resectable Gastric Cancer: A Randomized Clinical Trial
Source: PubMed Central journal article supplement (PMC8886520; doi:10.1001/jamanetworkopen.2022.0426), 2022-02-28
Supplement: jamanetwopen-e220426-s003.pdf [file jamanetwopen-e220426-s003.pdf]

## Data Sharing Statement

Yu. Effect of S-1 Plus Oxaliplatin Compared With Fluorouracil, Leucovorin Plus Oxaliplatin as Perioperative Chemotherapy for Locally Advanced, Resectable Gastric Cancer. *JAMA Netw Open*. Published February 28, 2022. doi:10.1001/jamanetworkopen.2022.0426

### Data

**Data available:** Yes

**Data types:** Deidentified participant data

**How to access data:** [yujr0909@zju.edu.cn](mailto:yujr0909@zju.edu.cn)

**When available:** With publication

### Supporting Documents

**Document types:** None

### Additional Information

**Who can access the data:** Anyone whose proposed use of the data has been approved

**Types of analyses:** for any purpose

**Mechanisms of data availability:** with investigator support, after approval of a proposal and with a signed data access agreement

**Any additional restrictions:** no
